# Supplementary material for: PyFeat: a Python-based effective feature generation tool for DNA, RNA and protein sequences
Source: Oxford University Press journal article supplement (doi:10.1093/bioinformatics/btz165), 2019-03-06
Supplement: bioinformatics_35_19_3831_s1.pdf [file bioinformatics_35_19_3831_s1.pdf]

# PyFeat: A Python-based Effective Features Generation Tool from DNA, RNA, and Protein Sequences

Rafsanjani Muhammod<sup>a</sup>, Sajid Ahmed<sup>a</sup>, Dewan Md Farid<sup>a</sup>, Swakkhar  
Shatabda<sup>a</sup>, Alok Sharma<sup>b,c,d</sup>, and Abdollah Dehzangi<sup>e</sup>

<sup>a</sup>Department of Computer Science and Engineering, United International University, Dhaka, Bangladesh

<sup>b</sup>School of Engineering and Physics, University of the South Pacific, Suva, Fiji

<sup>c</sup>RIKEN Center for Integrative Medical Sciences, Yokohama, Kanagawa, Japan

<sup>d</sup>Institute for Integrated and Intelligent Systems, Griffith University, Brisbane, Queensland, Australia

<sup>e</sup>Department of Computer Science, Morgan State University, Baltimore, Maryland, USA

## Supplementary Material

**PyFeat Version 1.0**

# Contents

|          |                                                              |           |
|----------|--------------------------------------------------------------|-----------|
| <b>1</b> | <b>Introduction</b>                                          | <b>5</b>  |
| <b>2</b> | <b>Download Package</b>                                      | <b>5</b>  |
| 2.1      | Direct Download: . . . . .                                   | 5         |
| 2.2      | Clone a GitHub Repository (Optional) . . . . .               | 5         |
| 2.2.1    | Clone over HTTPS . . . . .                                   | 5         |
| 2.2.2    | Clone over SSH . . . . .                                     | 6         |
| <b>3</b> | <b>Installation Process</b>                                  | <b>6</b>  |
| <b>4</b> | <b>Package Description</b>                                   | <b>7</b>  |
| <b>5</b> | <b>Working Procedure</b>                                     | <b>9</b>  |
| 5.1      | Generate Features . . . . .                                  | 9         |
| 5.1.1    | Training Purpose . . . . .                                   | 9         |
| 5.1.2    | Evaluation Purpose . . . . .                                 | 11        |
| 5.2      | Run Machine Learning Classifiers . . . . .                   | 11        |
| 5.3      | Training Model . . . . .                                     | 12        |
| 5.4      | Evaluation Model . . . . .                                   | 13        |
| <b>6</b> | <b>Features Description</b>                                  | <b>13</b> |
| 6.1      | Z-Curve . . . . .                                            | 14        |
| 6.1.1    | zCurve Mathematical Formula . . . . .                        | 14        |
| 6.1.2    | Command for generate dataset only zCurve method . . . . .    | 15        |
| 6.1.3    | Generate dataset using zCurve . . . . .                      | 15        |
| 6.2      | gcContent . . . . .                                          | 16        |
| 6.2.1    | gcContent Mathematical Formula . . . . .                     | 16        |
| 6.2.2    | Command for generate dataset only gcContent method . . . . . | 16        |
| 6.2.3    | Generate dataset using gcContent method . . . . .            | 16        |
| 6.3      | atgcRatio . . . . .                                          | 17        |
| 6.3.1    | atgcRatio Mathematical Formula . . . . .                     | 17        |

|        |                                                                   |    |
|--------|-------------------------------------------------------------------|----|
| 6.3.2  | Command for generate dataset only atgcRatio method . . . . .      | 17 |
| 6.3.3  | Generate dataset using atgcRatio . . . . .                        | 17 |
| 6.4    | cumulativeSkew . . . . .                                          | 18 |
| 6.4.1  | cumulativeSkew Mathematical Formula . . . . .                     | 18 |
| 6.4.2  | Command for generate dataset only cumulativeSkew method . . . . . | 18 |
| 6.4.3  | Generate dataset using cumulativeSkew . . . . .                   | 18 |
| 6.5    | pseudoKNC . . . . .                                               | 19 |
| 6.5.1  | pseudoKNC Theoretical Description . . . . .                       | 19 |
| 6.5.2  | Command for generate dataset only pseudoKNC method . . . . .      | 20 |
| 6.5.3  | Generate dataset using pseudoKNC . . . . .                        | 20 |
| 6.5.4  | important definitions . . . . .                                   | 20 |
| 6.6    | monoMonoKGap . . . . .                                            | 21 |
| 6.6.1  | monoMonoKGap Theoretical Description . . . . .                    | 21 |
| 6.6.2  | Command for generate dataset only monoMonoKGap method . . . . .   | 22 |
| 6.6.3  | Generate dataset using monoMonoKGap . . . . .                     | 22 |
| 6.7    | monoDiKGap . . . . .                                              | 22 |
| 6.7.1  | monoDiKGap Theoretical Description . . . . .                      | 22 |
| 6.7.2  | Command for generate dataset only monoDiKGap method . . . . .     | 24 |
| 6.7.3  | Generate dataset using monoDiKGap . . . . .                       | 24 |
| 6.8    | monoTriKGap . . . . .                                             | 24 |
| 6.8.1  | monoTriKGap Theoretical Description . . . . .                     | 24 |
| 6.8.2  | Command for generate dataset only monoTriKGap method . . . . .    | 28 |
| 6.8.3  | Generate dataset using monoTriKGap . . . . .                      | 28 |
| 6.9    | diMonoKGap . . . . .                                              | 28 |
| 6.9.1  | diMonoKGap Theoretical Description . . . . .                      | 28 |
| 6.9.2  | Command for generate dataset only diMonoKGap method . . . . .     | 29 |
| 6.9.3  | Generate dataset using diMonoKGap . . . . .                       | 29 |
| 6.10   | diDiKGap . . . . .                                                | 29 |
| 6.10.1 | diDiKGap Theoretical Description . . . . .                        | 29 |
| 6.10.2 | Command for generate dataset only diDiKGap method . . . . .       | 30 |

|          |                                                                |           |
|----------|----------------------------------------------------------------|-----------|
| 6.10.3   | Generate dataset using diDiKGap . . . . .                      | 30        |
| 6.11     | diTriKGap . . . . .                                            | 30        |
| 6.11.1   | diTriKGap Theoretical Description . . . . .                    | 30        |
| 6.11.2   | Command for generate dataset only diTriKGap method . . . . .   | 31        |
| 6.11.3   | Generate dataset using diTriKGap . . . . .                     | 31        |
| 6.12     | triMonoKGap . . . . .                                          | 31        |
| 6.12.1   | triMonoKGap Theoretical Description . . . . .                  | 31        |
| 6.12.2   | Command for generate dataset only triMonoKGap method . . . . . | 32        |
| 6.12.3   | Generate dataset using triMonoKGap . . . . .                   | 32        |
| 6.13     | triDiKGap . . . . .                                            | 32        |
| 6.13.1   | triDiKGap Theoretical Description . . . . .                    | 32        |
| 6.13.2   | Command for generate dataset only triDiKGap method . . . . .   | 33        |
| 6.13.3   | Generate dataset using triDiKGap . . . . .                     | 33        |
| <b>7</b> | <b>Feature Calculation</b>                                     | <b>34</b> |
| <b>8</b> | <b>AdaBoost</b>                                                | <b>35</b> |
| <b>9</b> | <b>Tool Comparison</b>                                         | <b>36</b> |

# 1 Introduction

The PyFest is an extensive Python-based tool for generating various numerical feature presentation schemes from DNA, RNA and protein sequences. This tool is also able to select the best features among from previously generated vast amount of features. After that, it can train model, to evaluate model using various machine learning techniques.

## 2 Download Package

### 2.1 Direct Download:

PyFeat package can be [downloaded](#) by clicking the link. This package will be download in zip (.zip) format named PyFeat-master.zip.

### 2.2 Clone a GitHub Repository (Optional)

Cloning a repository syncs it to our local machine. After clone, we can add and edit files and then push and pull updates. We can follow any one procedure that given below with illustration (a) clone over HTTPS, (b) or clone over SSH.

#### 2.2.1 Clone over HTTPS

`user@machine:~$ git clone https://github.com/mrzResearchArena/PyFeat.git`

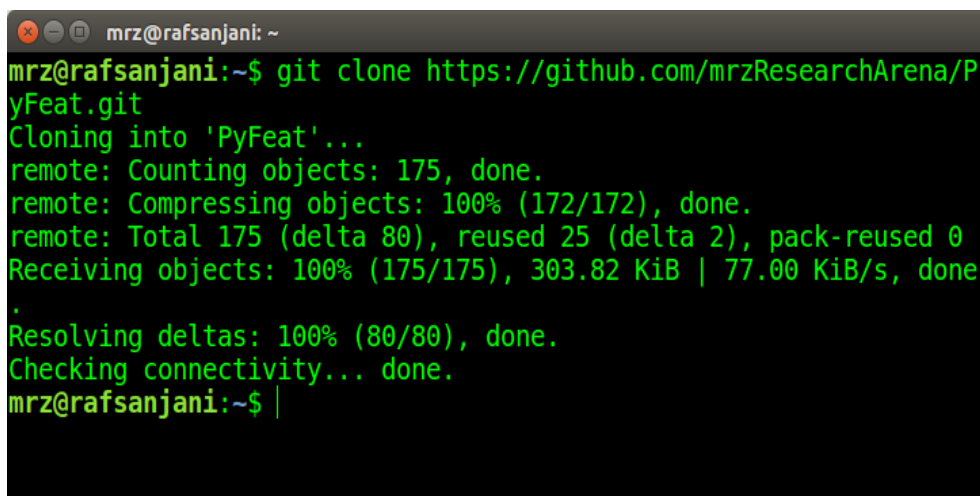

```
mrz@rafsanjani: ~  
mrz@rafsanjani:~$ git clone https://github.com/mrzResearchArena/PyFeat.git  
Cloning into 'PyFeat'...  
remote: Counting objects: 175, done.  
remote: Compressing objects: 100% (172/172), done.  
remote: Total 175 (delta 80), reused 25 (delta 2), pack-reused 0  
Receiving objects: 100% (175/175), 303.82 KiB | 77.00 KiB/s, done  
.  
Resolving deltas: 100% (80/80), done.  
Checking connectivity... done.  
mrz@rafsanjani:~$ |
```

Figure 1: Clone over HTTPS

## 2.2.2 Clone over SSH

```
user@machine:~$ git clone git@github.com:mrzResearchArena/PyFeat.git
```

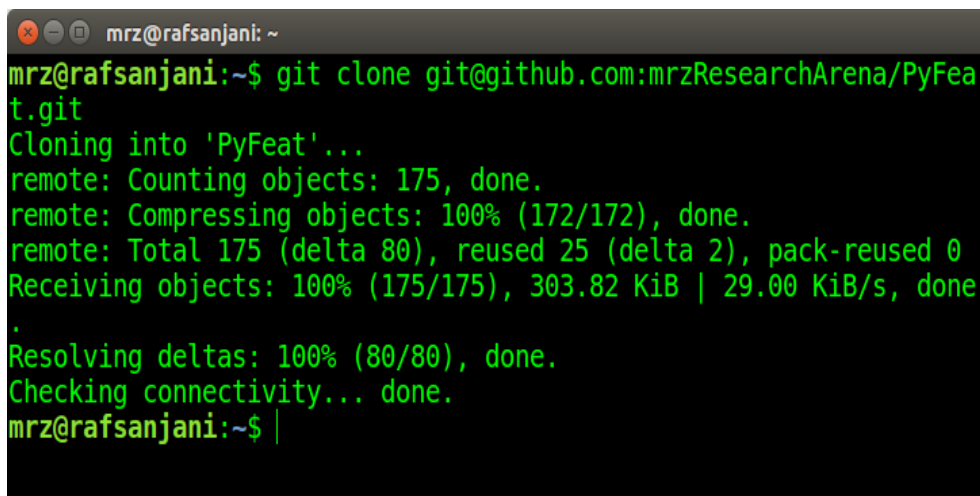A terminal window with a black background and green text. The window title is 'mrz@rafsanjani: ~'. The command 'git clone git@github.com:mrzResearchArena/PyFeat.git' is entered. The output shows the cloning process: 'Cloning into 'PyFeat'...', 'remote: Counting objects: 175, done.', 'remote: Compressing objects: 100% (172/172), done.', 'remote: Total 175 (delta 80), reused 25 (delta 2), pack-reused 0', 'Receiving objects: 100% (175/175), 303.82 KiB | 29.00 KiB/s, done.', 'Resolving deltas: 100% (80/80), done.', and 'Checking connectivity... done.'. The prompt 'mrz@rafsanjani:~\$' is visible at the end of the output.

```
mrz@rafsanjani:~$ git clone git@github.com:mrzResearchArena/PyFeat.git
Cloning into 'PyFeat'...
remote: Counting objects: 175, done.
remote: Compressing objects: 100% (172/172), done.
remote: Total 175 (delta 80), reused 25 (delta 2), pack-reused 0
Receiving objects: 100% (175/175), 303.82 KiB | 29.00 KiB/s, done
.
Resolving deltas: 100% (80/80), done.
Checking connectivity... done.
mrz@rafsanjani:~$ |
```

Figure 2: Clone over SSH

**Note:** If the clone was successful, a new sub-directory appears on our local drive. This directory has the same name (PyFeat) as the [github](#) repository that we cloned. We can run any Linux-based command from any valid location or path, but by default, a command generally runs from `/home/user/` and `user` is the name of our computer but your computer name can be different (Example: `/home/bioinformatics/`).

## 3 Installation Process

PyFest is an open-source Python-based tool, which operates depending on the Python environment (Python version 3.5 or above) and can be run on multi-OS systems (such as Linux-based OS, Mac OS, and Windows OS), but we will recommend you to use Linux-based OS. Before running PyFeat, a user should make sure all the following packages are installed in their Python environment:

1. Generate Features:
  - python (version  $\geq 3.5$ ), and
  - numpy (version  $\geq 1.13.0$ ).

## 2. Performance Measures (Optional):

- sklearn (version  $\geq 0.19.0$ ),
- pandas (version  $\geq 0.21.0$ ), and
- matplotlib (version  $\geq 2.1.0$ ).

For convenience, we strongly recommended users to install the Anaconda (Python version  $\geq 3.5$ ) on your local computer. This software can be freely downloaded from <https://www.anaconda.com/download/>. We can also follow from <https://github.com/mrzResearchArena/PyFeat/blob/master/README.md> (Section 2.).

## 4 Package Description

PyFeat tool mainly contains two directory named ‘Codes’, and ‘Datasets’.

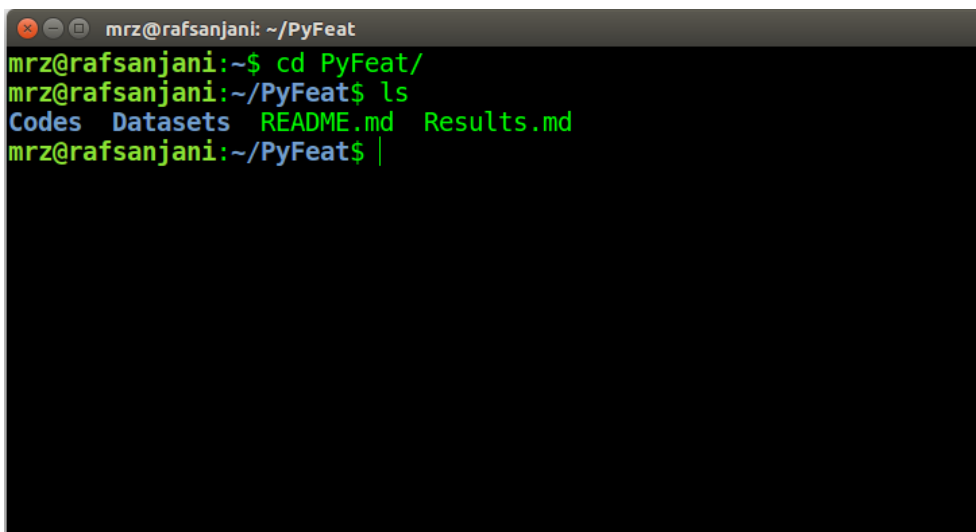A terminal window screenshot showing a user navigating to the PyFeat directory and listing its contents. The terminal output is as follows:

```
mrz@rafsanjani: ~/PyFeat
mrz@rafsanjani:~$ cd PyFeat/
mrz@rafsanjani:~/PyFeat$ ls
Codes  Datasets  README.md  Results.md
mrz@rafsanjani:~/PyFeat$ |
```

Figure 3: Enter ‘PyFeat’ directory and seeing all the files

The ‘Codes’ directory/folder contains all the codes (**\*.py files**). PyFeat includes four main programs: ‘**main.py**’, ‘**runClassifiers.py**’, ‘**trainModel.py**’, and ‘**evaluate-Model.py**’.

- ‘**main.py**’ is the main programme, it will generate datasets.
- ‘**runClassifiers.py**’ programme, it will work for n-fold cross-validation with different machine learning classifiers and also provide the classifications results.

- ‘trainModel.py’ programme, it able to train an individual model.
- ‘evaluateModel.py’ programme, it able to evaluate the trained model.

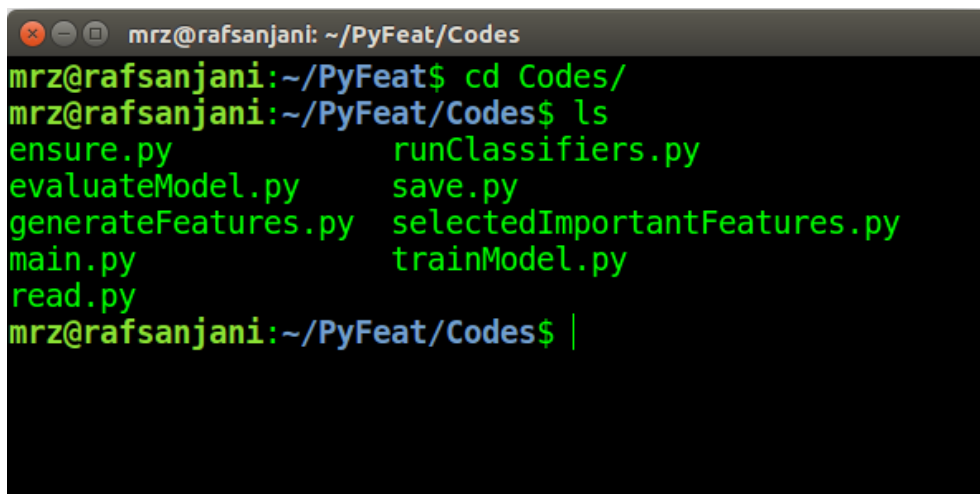

```
mrz@rafsanjani: ~/PyFeat/Codes
mrz@rafsanjani:~/PyFeat$ cd Codes/
mrz@rafsanjani:~/PyFeat/Codes$ ls
ensure.py          runClassifiers.py
evaluateModel.py  save.py
generateFeatures.py selectedImportantFeatures.py
main.py           trainModel.py
read.py
mrz@rafsanjani:~/PyFeat/Codes$ |
```

Figure 4: Enter ‘Codes’ directory and seeing all the .py files

The ‘Datasets’ directory/folder contains another three directory/folder named ‘DNA’, ‘RNA’, and ‘Protein’ where we will find DNA, RNA, and protein sequences respectively.

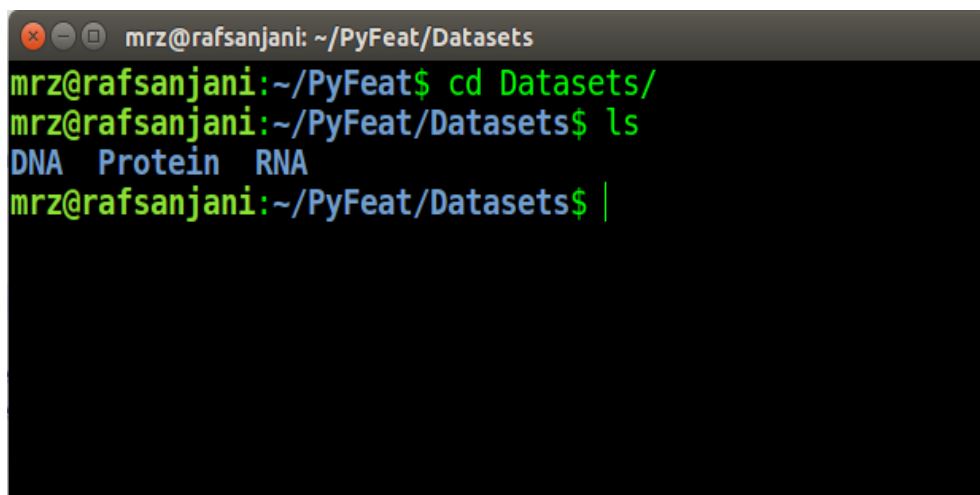

```
mrz@rafsanjani: ~/PyFeat/Datasets
mrz@rafsanjani:~/PyFeat$ cd Datasets/
mrz@rafsanjani:~/PyFeat/Datasets$ ls
DNA Protein RNA
mrz@rafsanjani:~/PyFeat/Datasets$ |
```

Figure 5: Enter the ‘Datasets’ directory



## 5 Working Procedure

### 5.1 Generate Features

#### 5.1.1 Training Purpose

Generate datasets for training purpose. Unix command line given below.

We can use full argument:

```
user@machine:~/PyFeat/Codes$ python main.py --sequenceType=DNA \  
--fullDataset=1 --optimumDataset=1 \  
--fasta=/home/user/PyFest/Datasets/DNA/FASTA.txt \  
--label=/home/user/PyFest/Datasets/DNA/Labels.txt \  
--kTuple=3 --kGap=5 \  
--pseudoKNC=1 --zCurve=1 --gcContent=1 --cumulativeSkew=1 --atgcRatio=1 \  
--monoMono=1 --monoDi=1 --monoTri=1 --diMono=1 --diDi=1 \  
--diTri=1 --triMono=1 --triDi=1
```

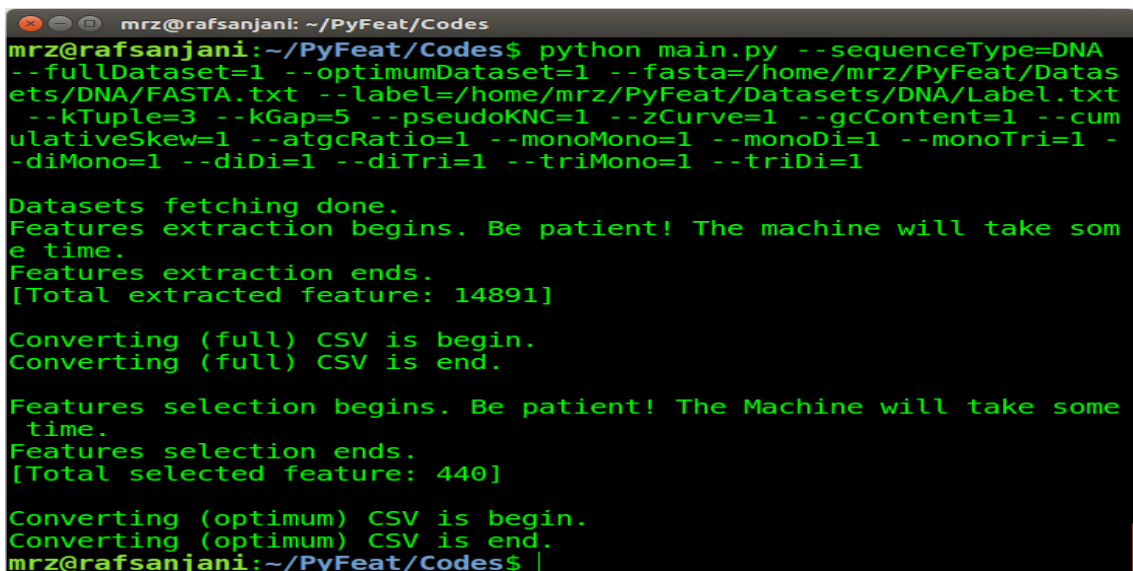

```
mrz@rafsanjani: ~/PyFeat/Codes  
mrz@rafsanjani:~/PyFeat/Codes$ python main.py --sequenceType=DNA  
--fullDataset=1 --optimumDataset=1 --fasta=/home/mrz/PyFeat/Datas  
ets/DNA/FASTA.txt --label=/home/mrz/PyFeat/Datasets/DNA/Label.txt  
--kTuple=3 --kGap=5 --pseudoKNC=1 --zCurve=1 --gcContent=1 --cum  
ulativeSkew=1 --atgcRatio=1 --monoMono=1 --monoDi=1 --monoTri=1 --  
diMono=1 --diDi=1 --diTri=1 --triMono=1 --triDi=1  
Datasets fetching done.  
Features extraction begins. Be patient! The machine will take som  
e time.  
Features extraction ends.  
[Total extracted feature: 14891]  
Converting (full) CSV is begin.  
Converting (full) CSV is end.  
Features selection begins. Be patient! The Machine will take some  
time.  
Features selection ends.  
[Total selected feature: 440]  
Converting (optimum) CSV is begin.  
Converting (optimum) CSV is end.  
mrz@rafsanjani:~/PyFeat/Codes$ |
```

Figure 6: Training with Arguments

or, we can also use corresponding optional argument:

```
user@machine:~/PyFeat/Codes$ python main.py -seq=DNA \  
-full=1 -optimum=1 \  
-fa=/home/user/PyFeat/Datasets/DNA/FASTA.txt \  
-la=/home/user/PyFeat/Datasets/DNA/Label.txt \  
-ktuple=3 -kgap=5 \  
-pseudo=1 -zcurve=1 -gc=1 -skew=1 -atgc=1 \  
-f11=1 -f12=1 -f13=1 -f21=1 -f22=1 -f23=1 -f31=1 -f32=1
```

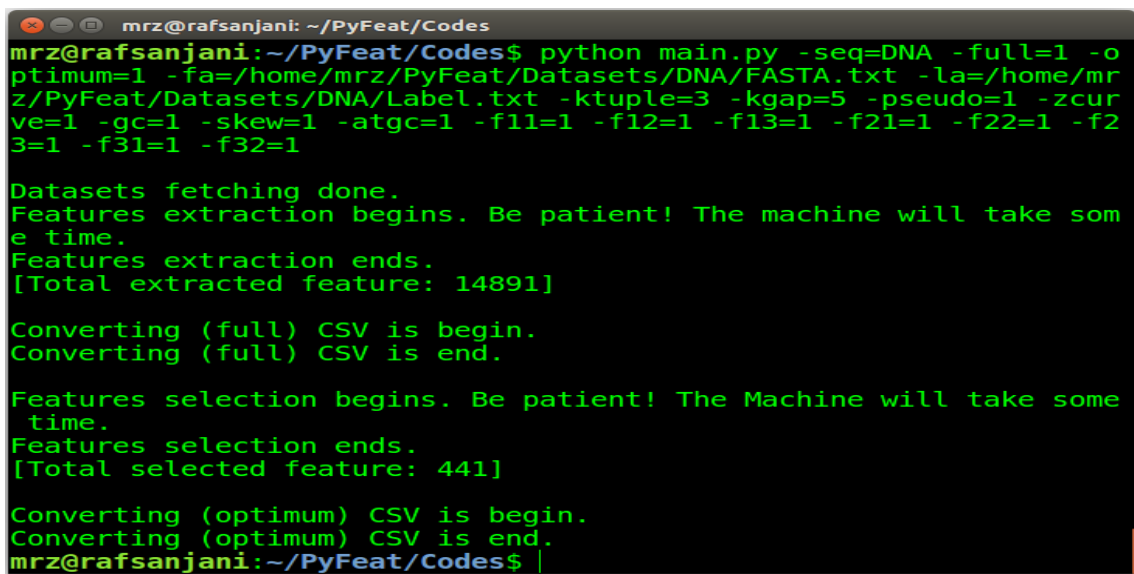

```
mrz@rafsanjani: ~/PyFeat/Codes  
mrz@rafsanjani:~/PyFeat/Codes$ python main.py -seq=DNA -full=1 -o  
ptimum=1 -fa=/home/mrz/PyFeat/Datasets/DNA/FASTA.txt -la=/home/mr  
z/PyFeat/Datasets/DNA/Label.txt -ktuple=3 -kgap=5 -pseudo=1 -zcur  
ve=1 -gc=1 -skew=1 -atgc=1 -f11=1 -f12=1 -f13=1 -f21=1 -f22=1 -f2  
3=1 -f31=1 -f32=1  
  
Datasets fetching done.  
Features extraction begins. Be patient! The machine will take som  
e time.  
Features extraction ends.  
[Total extracted feature: 14891]  
  
Converting (full) CSV is begin.  
Converting (full) CSV is end.  
  
Features selection begins. Be patient! The Machine will take some  
time.  
Features selection ends.  
[Total selected feature: 441]  
  
Converting (optimum) CSV is begin.  
Converting (optimum) CSV is end.  
mrz@rafsanjani:~/PyFeat/Codes$ |
```

Figure 7: Training with Corresponding Optional Arguments

It will generate a full dataset named **fullDataset.csv** (if `-full=1` or `--fullDataset=1`), and it will also generate a selected features dataset named **optimumDataset.csv** (if `-optimum=1` or `--optimumDataset=1`). On the contrary, if you don't want to generate full dataset simply set `-full=0` or `--fullDataset=0`, and if you don't want to generate optimum dataset simply set `-optimum=0` or `--optimumDataset=0`. The equal sign (=) is optional. To know more details about arguments: <https://github.com/mrzResearchArena/PyFeat/blob/master/README.md> (Table 1).

### 5.1.2 Evaluation Purpose

Generate datasets for evaluation purpose. Unix command line given below.

We can use full argument:

```
user@machine:~/PyFeat/Codes$ python main.py --sequenceType=Protein \  
--testDataset=1 --fasta=/home/user/PyFeat/Datasets/Protein/independentFASTA.txt \  
--label=/home/user/PyFeat/Datasets/Protein/independentLabel.txt \  
--kTuple=3 --kGap=5 \  
--pseudoKNC=1 --zCurve=1 --gcContent=1 --cumulativeSkew=1 --atgcRatio=1 \  
--monoMono=1 --monoDi=1 --monoTri=1 --diMono=1 --diDi=1 \  
--diTri=1 --triMono=1 --triDi=1
```

or, we can also use corresponding optional argument:

```
user@machine:~/PyFeat/Codes$ python main.py -seq=Protein -test=1 \  
-fa=/home/user/PyFeat/Datasets/Protein/independentFASTA.txt \  
-la=/home/user/PyFeat/Datasets/Protein/independentLabel.txt \  
-ktuple=3 -kgap=5 \  
-pseudo=1 -zcurve=1 -gc=1 -skew=1 -atgc=1 \  
-f11=1 -f12=1 -f13=1 -f21=1 -f22=1 -f23=1 -f31=1 -f32=1
```

It will generate a full testing dataset named **testDataset.csv** (if `-test=1` or `-testDataset==1`).

To know more details about arguments: <https://github.com/mrzResearchArena/PyFeat/blob/master/README.md> (Table 1).

The process will run smoothly for **valid FASTA** sequences and row-wise binary class label  $\{0, 1\}$ , or  $\{-1, +1\}$ .

## 5.2 Run Machine Learning Classifiers

Running machine learning classifiers with n-fold cross-validation. Unix command line given below.

```
user@machine:~/PyFeat/Codes$ python runClassifiers.py --nFCV=10 \  
--dataset=optimumDataset.csv --auROC=1 --boxPlot=1
```

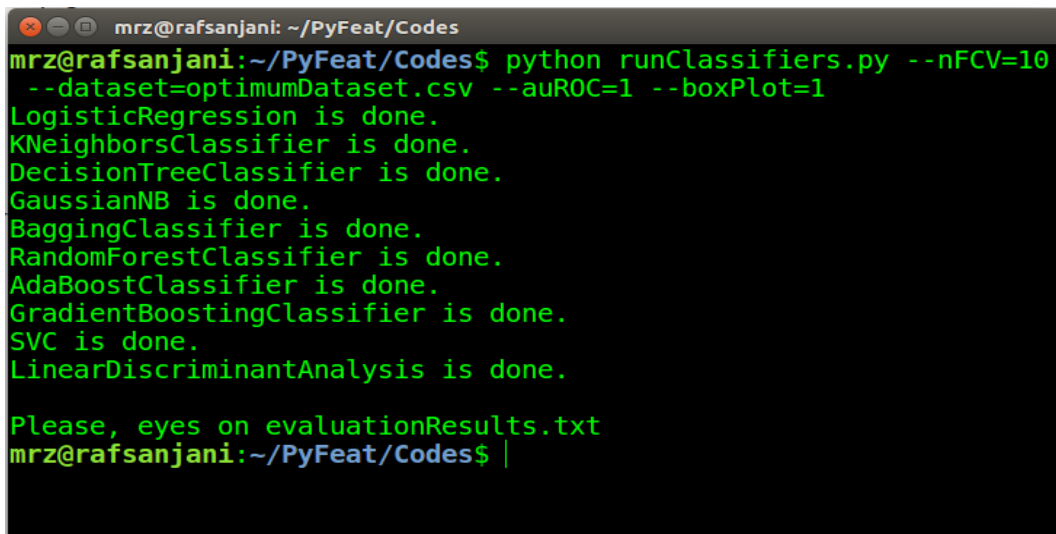

```
mrz@rafsanjani: ~/PyFeat/Codes  
mrz@rafsanjani:~/PyFeat/Codes$ python runClassifiers.py --nFCV=10  
--dataset=optimumDataset.csv --auROC=1 --boxPlot=1  
LogisticRegression is done.  
KNeighborsClassifier is done.  
DecisionTreeClassifier is done.  
GaussianNB is done.  
BaggingClassifier is done.  
RandomForestClassifier is done.  
AdaBoostClassifier is done.  
GradientBoostingClassifier is done.  
SVC is done.  
LinearDiscriminantAnalysis is done.  
  
Please, eyes on evaluationResults.txt  
mrz@rafsanjani:~/PyFeat/Codes$ |
```

Figure 8: Running different machine learning classifiers

It will provide classification results (**evaluationResults.txt**) from the user provides binary class dataset (.csv format), and it will also generate a ROC Curve (**auROC.png**), and an accuracy comparison via boxPlot (**AccuracyBoxPlot.png**). To know more details about arguments: <https://github.com/mrzResearchArena/PyFeat/blob/master/README.md> (Table 3).

### 5.3 Training Model

Training model with single classifier. Unix command line given below.

```
user@machine:~/PyFeat/Codes$ python trainModel.py \  
--dataset=optimumDataset.csv --model=LR
```

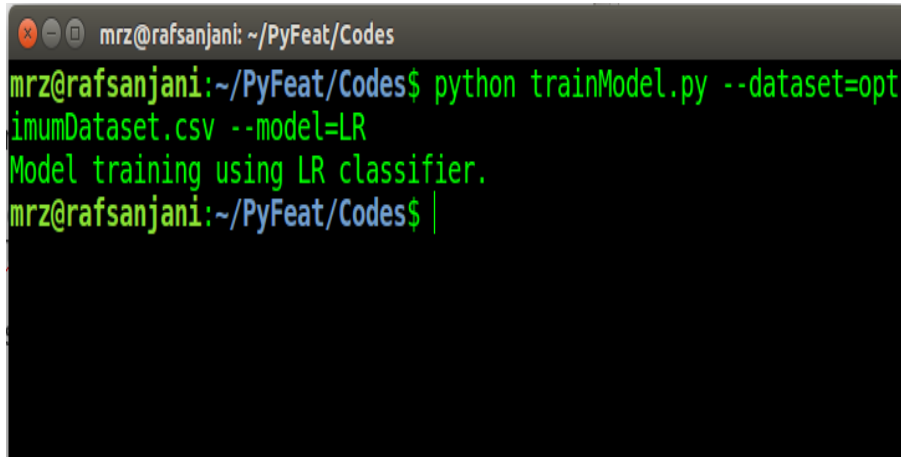A terminal window with a dark background and light green text. The window title is "mrz@rafsanjani: ~/PyFeat/Codes". The command entered is "python trainModel.py --dataset=optimumDataset.csv --model=LR". The output shows "Model training using LR classifier." followed by a prompt "mrz@rafsanjani:~/PyFeat/Codes\$ |".

```
mrz@rafsanjani:~/PyFeat/Codes$ python trainModel.py --dataset=optimumDataset.csv --model=LR
Model training using LR classifier.
mrz@rafsanjani:~/PyFeat/Codes$ |
```

Figure 9: Training dataset with a single model

It will provide a **dumpModel.pkl** from the user provides binary class dataset (.csv format). To know more details about arguments: <https://github.com/mrzResearchArena/PyFeat/blob/master/README.md> (Table 4).

## 5.4 Evaluation Model

Evaluation model from the previously trained model. Unix command line given below.

```
user@machine:~/PyFeat/Codes$ python evaluateModel.py \
--optimumDatasetPath=optimumDataset.csv --testDatasetPath=testDataset.csv
```

Here, **optimumDataset.csv**, and **testDataset.csv** using as a training dataset and test dataset respectively. To know more details about arguments: <https://github.com/mrzResearchArena/PyFeat/blob/master/README.md> (Table 5).

## 6 Features Description

We have taken two DNA's FASTA sequences as example. One is for positive (>Positive Sequence), and another is for negative (>Negative Sequence) example respectively.

Box 1: Sample FASTA file (File name: demoFASTAs.txt or demoFASTAs.fa)

```
>Positive Sequence
TCAGGGAGATGTGAGCCAGCTCACCATAAAAAAGCCG
>Negative Sequence
ATTGCGCGGTACAACATAAAAAACGCTGTTCCGATGGA
```

Box 2: Sample label file (File name: demoLabels.txt)

```
1
0
```

## 6.1 Z-Curve

### 6.1.1 zCurve Mathematical Formula

Z-curve theory is often used in genomic sequence analysis. It has got three components in three axis. They are defined as following.

$$\begin{cases} x \text{ axis} = (\sum A + \sum G) - (\sum C + \sum T) \\ y \text{ axis} = (\sum A + \sum C) - (\sum G + \sum T) \\ z \text{ axis} = (\sum A + \sum T) - (\sum G + \sum C) \end{cases} \quad (1)$$

Three features will generate using the zCurve method.

### 6.1.2 Command for generate dataset only zCurve method

```
mrz@rafsanjani: ~/PyFeat/Codes
mrz@rafsanjani:~/PyFeat/Codes$ python main.py -fa=/home/mrz/PyFeat/Datasets/DNA/demoFASTAs.txt -la=/home/mrz/PyFeat/Datasets/DNA/demoLabels.txt -full=1 -optimum=1 -zcurve=1

Datasets fetching done.
Features extraction begins. Be patient! The machine will take some time.
Features extraction ends.
[Total extracted feature: 3]

Converting (full) CSV is begin.
Converting (full) CSV is end.

Features selection begins. Be patient! The Machine will take some time.
Features selection ends.
[Total selected feature: 2]

Converting (optimum) CSV is begin.
Converting (optimum) CSV is end.
mrz@rafsanjani:~/PyFeat/Codes$ |
```

Figure 10: Extract features using zCurve

### 6.1.3 Generate dataset using zCurve

For '>Positive Sequence':  $\sum A=13$ ,  $\sum C=9$ ,  $\sum G=10$ , and  $\sum T=5$ . So, x axis= $((13+10)-(9+5))=9$ , y axis= $((13+9)-(10+5))=7$ , and z axis= $((13+5)-(10+9))=-1$ ; and '>Negative Sequence':  $\sum A=12$ ,  $\sum C=8$ ,  $\sum G=9$ ,  $\sum T=8$ . So, x axis= $((12+9)-(8+8))=5$ , y axis= $((12+8)-(9+8))=3$ , and z axis= $((12+8)-(9+8))=3$ .

Box 3: Sample dataset using zCurve (File name: fullDataset.csv)

|    |    |     |   |
|----|----|-----|---|
| 9, | 7, | -1, | 1 |
| 5, | 3, | 3,  | 0 |

**Note:** The last number of each row represents the 'class/type' of each FASTA sequence. Here '1' and '0' are for '>Positive Sequence' and '>Negative Sequence' respectively.

## 6.2 gcContent

### 6.2.1 gcContent Mathematical Formula

In general, GC-content is expressed as a percentage value (%).

$$GC\ Content = \frac{\sum G + \sum C}{\sum A + \sum C + \sum G + \sum T} \times 100\% \quad (2)$$

DNA with high GC-content is more stable than DNA with low GC-content. One feature will generate using the GC-content method.

### 6.2.2 Command for generate dataset only gcContent method

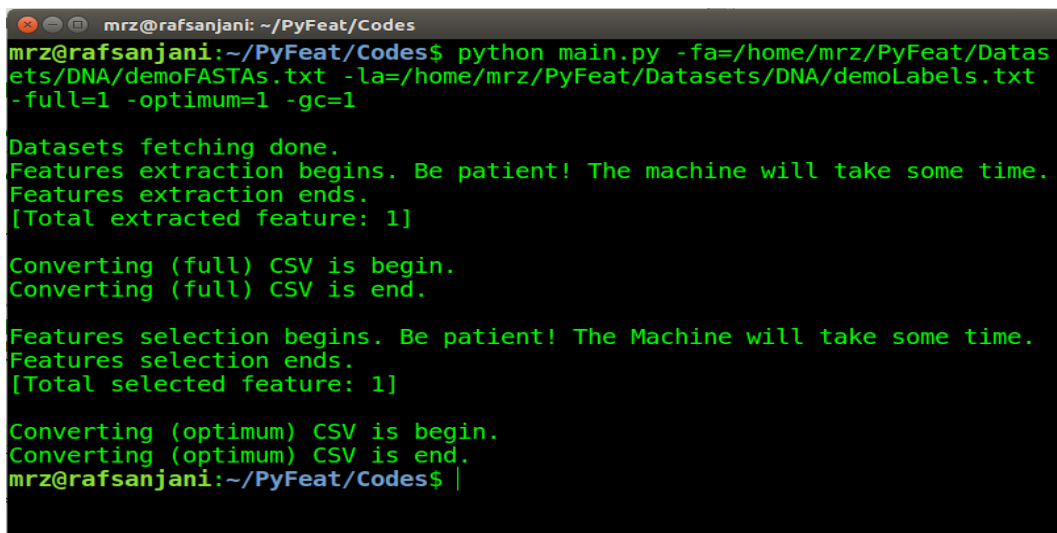

```
mrz@rafsanjani: ~/PyFeat/Codes
mrz@rafsanjani:~/PyFeat/Codes$ python main.py -fa=/home/mrz/PyFeat/Datasets/DNA/demoFASTAs.txt -la=/home/mrz/PyFeat/Datasets/DNA/demoLabels.txt -full=1 -optimum=1 -gc=1
Datasets fetching done.
Features extraction begins. Be patient! The machine will take some time.
Features extraction ends.
[Total extracted feature: 1]
Converting (full) CSV is begin.
Converting (full) CSV is end.
Features selection begins. Be patient! The Machine will take some time.
Features selection ends.
[Total selected feature: 1]
Converting (optimum) CSV is begin.
Converting (optimum) CSV is end.
mrz@rafsanjani:~/PyFeat/Codes$
```

Figure 11: Extract features using gcContent

### 6.2.3 Generate dataset using gcContent method

For '>Positive Sequence':  $\sum A=13$ ,  $\sum C=9$ ,  $\sum G=10$ , and  $\sum T=5$ . So, GC Content= $(19/37)=51.35$ ; and '>Negative Sequence':  $\sum A=12$ ,  $\sum C=8$ ,  $\sum G=9$ ,  $\sum T=8$ . So, GC Content= $(17/37)=45.95$ .

Box 4: Sample dataset using gcContent (File name: fullDataset.csv)

|          |
|----------|
| 51.35, 1 |
| 45.95, 0 |



## 6.3 atgcRatio

### 6.3.1 atgcRatio Mathematical Formula

Single feature will generate using the AT/GT Ratio method. The equation is given below.

$$AT/GC Ratio = \frac{\sum A + \sum T}{\sum G + \sum C} \quad (3)$$

### 6.3.2 Command for generate dataset only atgcRatio method

```
mrz@rafsanjani: ~/PyFeat/Codes
mrz@rafsanjani:~/PyFeat/Codes$ python main.py -fa=/home/mrz/PyFeat/Datasets/DNA/demoFASTAs.txt -la=/home/mrz/PyFeat/Datasets/DNA/demoLabels.txt -full=1 -optimum=1 -atgc=1

Datasets fetching done.
Features extraction begins. Be patient! The machine will take some time.
Features extraction ends.
[Total extracted feature: 1]

Converting (full) CSV is begin.
Converting (full) CSV is end.

Features selection begins. Be patient! The Machine will take some time.
Features selection ends.
[Total selected feature: 1]

Converting (optimum) CSV is begin.
Converting (optimum) CSV is end.
mrz@rafsanjani:~/PyFeat/Codes$ |
```

Figure 12: Extract features using atgcRatio

### 6.3.3 Generate dataset using atgcRatio

For '>Positive Sequence':  $\sum A=13$ ,  $\sum C=9$ ,  $\sum G=10$ , and  $\sum T=5$ . So, AT/GC Ratio= $(18/19)=0.95$ ; and '>Negative Sequence':  $\sum A=12$ ,  $\sum C=8$ ,  $\sum G=9$ ,  $\sum T=8$ . So, AT/GC Ratio= $(20/17)=1.18$ .

Box 5: Sample dataset atgcRatio (File name: fullDataset.csv)

|         |
|---------|
| 0.95, 1 |
| 1.18, 0 |

## 6.4 cumulativeSkew

### 6.4.1 cumulativeSkew Mathematical Formula

Due to deamination process there is a difference of the count of G and T in forward and reverse strands. The forward strand often have more G and T. The cumulative skew is defined formally as:

$$GC\ skew = \frac{\sum G - \sum C}{\sum G + \sum C}; \quad AT\ skew = \frac{\sum A - \sum T}{\sum A + \sum T} \quad (4)$$

### 6.4.2 Command for generate dataset only cumulativeSkew method

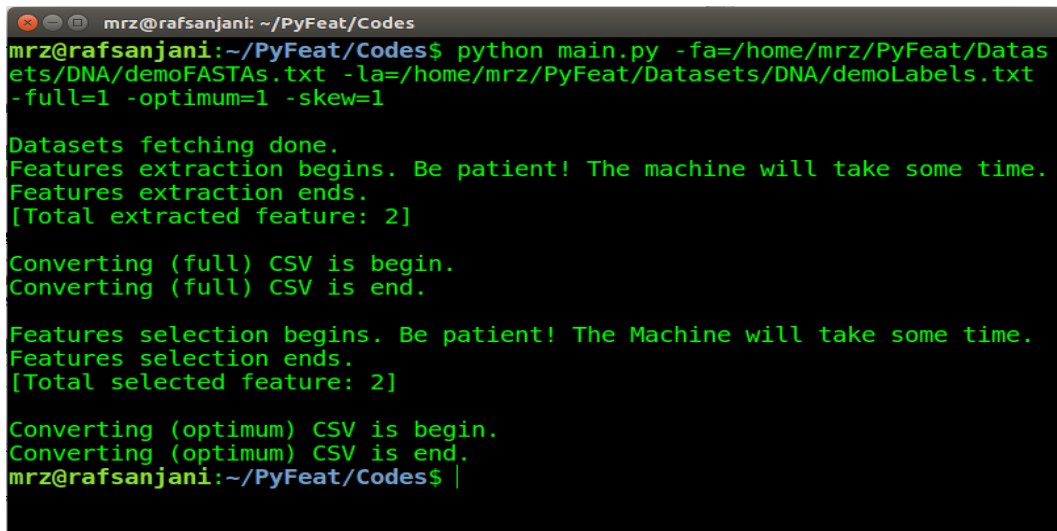

```
mrz@rafsanjani: ~/PyFeat/Codes
mrz@rafsanjani:~/PyFeat/Codes$ python main.py -fa=/home/mrz/PyFeat/Datasets/DNA/demoFASTAs.txt -la=/home/mrz/PyFeat/Datasets/DNA/demoLabels.txt -full=1 -optimum=1 -skew=1

Datasets fetching done.
Features extraction begins. Be patient! The machine will take some time.
Features extraction ends.
[Total extracted feature: 2]

Converting (full) CSV is begin.
Converting (full) CSV is end.

Features selection begins. Be patient! The Machine will take some time.
Features selection ends.
[Total selected feature: 2]

Converting (optimum) CSV is begin.
Converting (optimum) CSV is end.
mrz@rafsanjani:~/PyFeat/Codes$ |
```

Figure 13: Extract features using cumulative skew

Here as  $\sum A$  represents the total number of A,  $\sum C$  represents the total number of C from the sequence and so forth. Two features will generate using the cumulative skew method.

### 6.4.3 Generate dataset using cumulativeSkew

For '>Positive Sequence':  $\sum A=13$ ,  $\sum C=9$ ,  $\sum G=10$ , and  $\sum T=5$ . So, GC skew=0.05, and AT skew=0.44; and '>Negative Sequence':  $\sum A=12$ ,  $\sum C=8$ ,  $\sum G=9$ ,  $\sum T=8$ . So, GC skew=0.06, and AT skew=0.20.

Box 6: Sample dataset (File name: fullDataset.csv)

|               |
|---------------|
| 0.05, 0.44, 1 |
| 0.06, 0.20, 0 |

## 6.5 pseudoKNC

### 6.5.1 pseudoKNC Theoretical Description

When  $k=n$  then the  $\sum_{i=1}^n 4^i$  features will exist for DNA and RNA, but  $\sum_{i=1}^n 20^i$  features will exist for protein.

When  $k=1$ , feature structure will be **X**.

When  $k=2$ , feature structure will be **X**, and **XX**.

When  $k=3$ , feature structure will be **X**, **XX**, and **XXX**.

Described with appropriate examples:

When  $k=1$  then only four (4) features will exist for DNA and RNA, but twenty (20) features will exist for protein. Features will be numbers of A, C, G and T/U of the whole sequence of DNA and RNA respectively.

When  $k=2$  then only twenty (20) features will exist for DNA and RNA, but four hundred and twenty (420) features will exist for protein. Features will be numbers of A, C, G, T, AA, AC, AG, AT, CA, CC, CG, CT, GA, GC, GG, GT, TA, TC, TG, and TT of the whole sequence of DNA respectively.

When  $k=3$  then only eighty four (84) features will exist for DNA and RNA, but eight thousand four hundred and twenty (8,420) features will exist for protein. Features will be numbers of A, C, G, T, AA, AC, AG, AT, CA, CC, CG, CT, GA, GC, GG, GT, TA, TC, TG, TT, AAA, AAC, AAG, AAT, ACA, ACC, ACG, ACT, AGA, AGC, AGG, AGT, ATA, ATC, ATG, ATT, CAA, CAC, CAG, CAT, CCA, CCC, CCG, CCT, CGA, CGC, CGG, CGT, CTA, CTC, CTG, CTT, GAA, GAC, GAG, GAT, GCA, GCC, GCG, GCT, GGA, GGC, GGG, GGT, GTA, GTC, GTG, GTT, TAA, TAC, TAG, TAT, TCA, TCC, TCG,

TCT, TGA, TGC, TGG, TGT, TTA, TTC, TTG, and TTT of the whole sequence of DNA respectively.

### 6.5.2 Command for generate dataset only pseudoKNC method

```

mrz@rafsanjani: ~/PyFeat/Codes
mrz@rafsanjani:~/PyFeat/Codes$ python main.py -fa=/home/mrz/PyFeat/Datasets/DNA/demoFASTAs.txt -la=/home/mrz/PyFeat/Datasets/DNA/demoLabels.txt -full=1 -optimum=1 -pseudo=1 -ktuple=3
Datasets fetching done.
Features extraction begins. Be patient! The machine will take some time.
Features extraction ends.
[Total extracted feature: 84]

Converting (full) CSV is begin.
Converting (full) CSV is end.

Features selection begins. Be patient! The Machine will take some time.
Features selection ends.
[Total selected feature: 11]

Converting (optimum) CSV is begin.
Converting (optimum) CSV is end.
mrz@rafsanjani:~/PyFeat/Codes$ |

```

Figure 14: Extract features using PseudoKNC with -ktuple=3

### 6.5.3 Generate dataset using pseudoKNC

For '>Positive Sequence':  $\sum A=13, \sum C=9, \sum G=10, \sum T=5, \sum AA=3, \sum AC=1, \sum AG=5, \sum AT=2$  and so on upto three combination of ACGT; and '>Negative Sequence':  $\sum A=12, \sum C=8, \sum G=9, \sum T=8, \sum AA=4, \sum AC=3, \sum AG=0, \sum AT=2$  and so on upto three combination of ACGT.

Box 7: Sample dataset using pseudoKNC (File name: fullDataset.csv)

|                                               |
|-----------------------------------------------|
| 13, 9, 10, 5, 3, 1, 5, 2, ....., 0, 0, 0, 0 1 |
| 12, 8, 9, 8, 4, 3, 0, 2, ....., 0, 1, 1, 0, 0 |

### 6.5.4 important definitions

$$\mathbf{X} = \begin{cases} \{A,C,G,T\}, & \text{if the problem involves DNA sequences} \\ \{A,C,G,U\}, & \text{if the problem involves RNA sequences} \\ \{A,C,D,E,F,G,H,I,K,L,M,N,P,Q,R,S,T,V,W,Y\}, & \text{if the problem involves protein sequences} \end{cases}$$

$x_i \in \mathbf{X}$  where  $i$  specifies the position of  $x$  in some subsequence. Counts of such subsequences of varying lengths is regarded as features in our method.

$j \in \{1, 2, 3, \dots, k\}$  where  $j$  specifies the number of gaps (don't care) in a subsequence.

## 6.6 monoMonoKGap

### 6.6.1 monoMonoKGap Theoretical Description

When  $-k\text{gap}=n$  then the  $(4) \times (4) \times n$  features will exist for DNA and RNA but  $(20) \times (20) \times n$  features will exist for protein.

When  $-k\text{gap}=1$ , feature structure will be  $\mathbf{X\_X}$ .

When  $-k\text{gap}=2$ , feature structure will be  $\mathbf{X\_X}$ , and  $\mathbf{X\_X}$ .

When  $-k\text{gap}=3$ , feature structure will be  $\mathbf{X\_X}$ ,  $\mathbf{X\_X}$ , and  $\mathbf{X\_X}$ .

Described with appropriate examples:

When  $-k\text{gap}=1$  then only sixteen (16) features will exist for DNA and RNA but four hundred (400) features will exist for protein. Features will be numbers of A\_A, A\_C, A\_G, A\_T, C\_A, C\_C, C\_G, C\_T, G\_A, G\_C, G\_G, G\_T, T\_A, T\_C, T\_G, and T\_T of the whole sequence of DNA respectively.

When  $-k\text{gap}=2$  then only thirty two (32) features will exist for DNA and RNA but eight hundred (800) features will exist for protein. Features will be numbers of A\_A, A\_C, A\_G, A\_T, C\_A, C\_C, C\_G, C\_T, G\_A, G\_C, G\_G, G\_T, T\_A, T\_C, T\_G, T\_T, A\_A, A\_C, A\_G, A\_T, C\_A, C\_C, C\_G, C\_T, G\_A, G\_C, G\_G, G\_T, T\_A, T\_C, T\_G, and T\_T of the whole sequence of DNA respectively.

When  $-k\text{gap}=3$  then only forty eight (48) features will exist for DNA and RNA, but one thousand and two hundred (1,200) features will exist for protein. Features will be numbers of A\_A, A\_C, A\_G, A\_T, C\_A, C\_C, C\_G, C\_T, G\_A, G\_C, G\_G, G\_T, T\_A, T\_C, T\_G, T\_T, A\_A, A\_C, A\_G, A\_T, C\_A, C\_C, C\_G, C\_T, G\_A, G\_C, G\_G, G\_T, T\_A, T\_C, T\_G, T\_T, A\_A, A\_C, A\_G, A\_T, C\_A, C\_C, C\_G, C\_T, G\_A, G\_C, G\_G, G\_T, T\_A, T\_C, T\_G, T\_T, A\_A, A\_C, A\_G, A\_T, C\_A, C\_C, C\_G, C\_T, G\_A, G\_C, G\_G, G\_T, T\_A, T\_C, T\_G, and T\_T of the whole sequence of DNA respectively.

## 6.6.2 Command for generate dataset only monoMonoKGap method

```
mrz@rafsanjani: ~/PyFeat/Codes
mrz@rafsanjani:~/PyFeat/Codes$ python main.py -fa=/home/mrz/PyFeat/Datasets/DNA/demoFASTAs.txt -la=/home/mrz/PyFeat/Datasets/DNA/demoLabels.txt -full=1 -optimum=1 -f11=1 -kgap=1
Datasets fetching done.
Features extraction begins. Be patient! The machine will take some time.
Features extraction ends.
[Total extracted feature: 16]

Converting (full) CSV is begin.
Converting (full) CSV is end.

Features selection begins. Be patient! The Machine will take some time.
Features selection ends.
[Total selected feature: 5]

Converting (optimum) CSV is begin.
Converting (optimum) CSV is end.
mrz@rafsanjani:~/PyFeat/Codes$ |
```

Figure 15: Extract features using monoMonoKGap with -kgap=1

## 6.6.3 Generate dataset using monoMonoKGap

For '>Positive Sequence':  $\sum A.A=6$ ,  $\sum A.C=4$ ,  $\sum A.G=3$ ,  $\sum A.T=0$ , and so on; and  
'>Negative Sequence':  $\sum A.A=5$ ,  $\sum A.C=2$ ,  $\sum A.G=2$ ,  $\sum A.T=2$ , and so on.

Box 8: Sample dataset using monoMonoKGap (File name: fullDataset.csv)

|                                                   |
|---------------------------------------------------|
| 6, 4, 3, 0, 2, 2, 3, 1, 1, 2, 4, 2, 4, 0, 0, 1, 1 |
| 5, 2, 2, 2, 3, 2, 3, 0, 2, 0, 2, 4, 1, 4, 2, 1, 0 |

## 6.7 monoDiKGap

### 6.7.1 monoDiKGap Theoretical Description

When -kgap= $n$  then the  $(4) \times (4 \times 4) \times n$  features will exist for DNA and RNA, but  $(20) \times (20 \times 20) \times n$  features will exist for protein.

When -kgap=1, feature structure will be **X\_XX**.

When -kgap=2, feature structure will be **X\_XX**, and **X\_\_XX**.

When -kgap=3, feature structure will be **X\_XX**, **X\_\_XX**, and **X\_\_\_XX**.

Described with appropriate examples:

When  $-k_{\text{gap}}=1$  then only sixty four (64) features will exist for DNA and RNA, but eight thousand (8,000) features will exist for protein. Features will be numbers of A\_AA, A\_AC, A\_AG, A\_AT, A\_CA, A\_CC, A\_CG, A\_CT, A\_GA, A\_GC, A\_GG, A\_GT, A\_TA, A\_TC, A\_TG, A\_TT, C\_AA, C\_AC, C\_AG, C\_AT, C\_CA, C\_CC, C\_CG, C\_CT, C\_GA, C\_GC, C\_GG, C\_GT, C\_TA, C\_TC, C\_TG, C\_TT, G\_AA, G\_AC, G\_AG, G\_AT, G\_CA, G\_CC, G\_CG, G\_CT, G\_GA, G\_GC, G\_GG, G\_GT, G\_TA, G\_TC, G\_TG, G\_TT, T\_AA, T\_AC, T\_AG, T\_AT, T\_CA, T\_CC, T\_CG, T\_CT, T\_GA, T\_GC, T\_GG, T\_GT, T\_TA, T\_TC, T\_TG, and T\_TT of the whole sequence of DNA respectively.

When  $-k_{\text{gap}}=2$  then only hundred and twenty eight (128) features will exist for DNA and RNA, but sixteen thousand (16,000) features will exist for protein. Features will be numbers of A\_AA, A\_AC, A\_AG, A\_AT, A\_CA, A\_CC, A\_CG, A\_CT, A\_GA, A\_GC, A\_GG, A\_GT, A\_TA, A\_TC, A\_TG, A\_TT, C\_AA, C\_AC, C\_AG, C\_AT, C\_CA, C\_CC, C\_CG, C\_CT, C\_GA, C\_GC, C\_GG, C\_GT, C\_TA, C\_TC, C\_TG, C\_TT, G\_AA, G\_AC, G\_AG, G\_AT, G\_CA, G\_CC, G\_CG, G\_CT, G\_GA, G\_GC, G\_GG, G\_GT, G\_TA, G\_TC, G\_TG, G\_TT, T\_AA, T\_AC, T\_AG, T\_AT, T\_CA, T\_CC, T\_CG, T\_CT, T\_GA, T\_GC, T\_GG, T\_GT, T\_TA, T\_TC, T\_TG, T\_TT, A\_AA, A\_AC, A\_AG, A\_AT, A\_CA, A\_CC, A\_CG, A\_CT, A\_GA, A\_GC, A\_GG, A\_GT, A\_TA, A\_TC, A\_TG, A\_TT, C\_AA, C\_AC, C\_AG, C\_AT, C\_CA, C\_CC, C\_CG, C\_CT, C\_GA, C\_GC, C\_GG, C\_GT, C\_TA, C\_TC, C\_TG, C\_TT, G\_AA, G\_AC, G\_AG, G\_AT, G\_CA, G\_CC, G\_CG, G\_CT, G\_GA, G\_GC, G\_GG, G\_GT, G\_TA, G\_TC, G\_TG, G\_TT, T\_AA, T\_AC, T\_AG, T\_AT, T\_CA, T\_CC, T\_CG, T\_CT, T\_GA, T\_GC, T\_GG, T\_GT, T\_TA, T\_TC, T\_TG, and T\_TT of the whole sequence of DNA respectively.

## 6.7.2 Command for generate dataset only monoDiKGap method

```
mrz@rafsanjani: ~/PyFeat/Codes
mrz@rafsanjani:~/PyFeat/Codes$ python main.py -fa=/home/mrz/PyFeat/Datasets/DNA/demoFASTAs.txt -la=/home/mrz/PyFeat/Datasets/DNA/demoLabels.txt -full=1 -optimum=1 -f12=1 -kgap=1

Datasets fetching done.
Features extraction begins. Be patient! The machine will take some time.
Features extraction ends.
[Total extracted feature: 64]

Converting (full) CSV is begin.
Converting (full) CSV is end.

Features selection begins. Be patient! The Machine will take some time.
Features selection ends.
[Total selected feature: 3]

Converting (optimum) CSV is begin.
Converting (optimum) CSV is end.
mrz@rafsanjani:~/PyFeat/Codes$ |
```

Figure 16: Extract features using monoDiKGap with -kgap=1

## 6.7.3 Generate dataset using monoDiKGap

For '>Positive Sequence':  $\sum A_{AA}=4$ ,  $\sum A_{AC}=0$ ,  $\sum A_{AG}=1$ ,  $\sum A_{AT}=1$ , and so on;  
and '>Negative Sequence':  $\sum A_{AA}=4$ ,  $\sum A_{AC}=1$ ,  $\sum A_{AG}=0$ ,  $\sum A_{AT}=0$ , and so on.

Box 7: Sample dataset using monoDiKGap (File name: fullDataset.csv)

|                                |
|--------------------------------|
| 4, 0, 1, 1, 1, 2, 0, 1, ..., 1 |
| 4, 1, 0, 0, 0, 0, 1, 1, ..., 0 |

## 6.8 monoTriKGap

### 6.8.1 monoTriKGap Theoretical Description

When -kgap=n then the  $(4) \times (4 \times 4 \times 4) \times n$  features will exist for DNA and RNA, but  $(20) \times (20 \times 20 \times 20) \times n$  features will exist for protein.

When -kgap=1, feature structure will be **X\_XXX**.

When -kgap=2, feature structure will be **X\_XXX**, and **X\_\_XXX**.

When -kgap=3, feature structure will be **X\_XXX**, **X\_\_XXX**, and **X\_\_\_XXX**.



Described with appropriate examples:

When  $-k_{gap}=1$  then only two hundred and fifty six (256) features will exist for DNA and RNA, but hundred and sixty thousand (160,000) a huge amount of features will exist for protein. Features will be numbers of A\_AAA, A\_AAC, A\_AAG, A\_AAT, A\_ACA, A\_ACC, A\_ACG, A\_ACT, A\_AGA, A\_AGC, A\_AGG, A\_AGT, A\_ATA, A\_ATC, A\_ATG, A\_ATT, A\_CAA, A\_CAC, A\_CAG, A\_CAT, A\_CCA, A\_CCC, A\_CCG, A\_CCT, A\_CGA, A\_CGC, A\_CGG, A\_CGT, A\_CTA, A\_CTC, A\_CTG, A\_CTT, A\_GAA, A\_GAC, A\_GAG, A\_GAT, A\_GCA, A\_GCC, A\_GCG, A\_GCT, A\_GGA, A\_GGC, A\_GGG, A\_GGT, A\_GTA, A\_GTC, A\_GTG, A\_GTT, A\_TAA, A\_TAC, A\_TAG, A\_TAT, A\_TCA, A\_TCC, A\_TCG, A\_TCT, A\_TGA, A\_TGC, A\_TGG, A\_TGT, A\_TTA, A\_TTC, A\_TTG, A\_TTT, C\_AAA, C\_AAC, C\_AAG, C\_AAT, C\_ACA, C\_ACC, C\_ACG, C\_ACT, C\_AGA, C\_AGC, C\_AGG, C\_AGT, C\_ATA, C\_ATC, C\_ATG, C\_ATT, C\_CAA, C\_CAC, C\_CAG, C\_CAT, C\_CCA, C\_CCC, C\_CCG, C\_CCT, C\_CGA, C\_CGC, C\_CGG, C\_CGT, C\_CTA, C\_CTC, C\_CTG, C\_CTT, C\_GAA, C\_GAC, C\_GAG, C\_GAT, C\_GCA, C\_GCC, C\_GCG, C\_GCT, C\_GGA, C\_GGC, C\_GGG, C\_GGT, C\_GTA, C\_GTC, C\_GTG, C\_GTT, C\_TAA, C\_TAC, C\_TAG, C\_TAT, C\_TCA, C\_TCC, C\_TCG, C\_TCT, C\_TGA, C\_TGC, C\_TGG, C\_TGT, C\_TTA, C\_TTC, C\_TTG, C\_TTT, G\_AAA, G\_AAC, G\_AAG, G\_AAT, G\_ACA, G\_ACC, G\_ACG, G\_ACT, G\_AGA, G\_AGC, G\_AGG, G\_AGT, G\_ATA, G\_ATC, G\_ATG, G\_ATT, G\_CAA, G\_CAC, G\_CAG, G\_CAT, G\_CCA, G\_CCC, G\_CCG, G\_CCT, G\_CGA, G\_CGC, G\_CGG, G\_CGT, G\_CTA, G\_CTC, G\_CTG, G\_CTT, G\_GAA, G\_GAC, G\_GAG, G\_GAT, G\_GCA, G\_GCC, G\_GCG, G\_GCT, G\_GGA, G\_GGC, G\_GGG, G\_GGT, G\_GTA, G\_GTC, G\_GTG, G\_GTT, G\_TAA, G\_TAC, G\_TAG, G\_TAT, G\_TCA, G\_TCC, G\_TCG, G\_TCT, G\_TGA, G\_TGC, G\_TGG, G\_TGT, G\_TTA, G\_TTC, G\_TTG, G\_TTT, T\_AAA, T\_AAC, T\_AAG, T\_AAT, T\_ACA, T\_ACC, T\_ACG, T\_ACT, T\_AGA, T\_AGC, T\_AGG, T\_AGT, T\_ATA, T\_ATC, T\_ATG, T\_ATT, T\_CAA, T\_CAC, T\_CAG, T\_CAT, T\_CCA, T\_CCC, T\_CCG, T\_CCT, T\_CGA, T\_CGC, T\_CGG, T\_CGT, T\_CTA, T\_CTC, T\_CTG, T\_CTT, T\_GAA, T\_GAC, T\_GAG, T\_GAT, T\_GCA, T\_GCC, T\_GCG, T\_GCT, T\_GGA, T\_GGC, T\_GGG, T\_GGT, T\_GTA, T\_GTC, T\_GTG, T\_GTT, T\_TAA, T\_TAC, T\_TAG, T\_TAT, T\_TCA, T\_TCC, T\_TCG, T\_TCT, T\_TGA, T\_TGC, T\_TGG, T\_TGT, T\_TTA, T\_TTC, T\_TTG, and T\_TTT of the whole sequence of DNA respectively.

When -kgap=2 then only hundred and twenty eight (512) features will exist for DNA and RNA, but sixteen thousand (320,000) a huge amount of features will exist for protein. Features will be numbers of A\_AAA, A\_AAC, A\_AAG, A\_AAT, A\_ACA, A\_ACC, A\_ACG, A\_ACT, A\_AGA, A\_AGC, A\_AGG, A\_AGT, A\_ATA, A\_ATC, A\_ATG, A\_ATT, A\_CAA, A\_CAC, A\_CAG, A\_CAT, A\_CCA, A\_CCC, A\_CCG, A\_CCT, A\_CGA, A\_CGC, A\_CGG, A\_CGT, A\_CTA, A\_CTC, A\_CTG, A\_CTT, A\_GAA, A\_GAC, A\_GAG, A\_GAT, A\_GCA, A\_GCC, A\_GCG, A\_GCT, A\_GGA, A\_GGC, A\_GGG, A\_GGT, A\_GTA, A\_GTC, A\_GTG, A\_GTT, A\_TAA, A\_TAC, A\_TAG, A\_TAT, A\_TCA, A\_TCC, A\_TCG, A\_TCT, A\_TGA, A\_TGC, A\_TGG, A\_TGT, A\_TTA, A\_TTC, A\_TTG, A\_TTT, C\_AAA, C\_AAC, C\_AAG, C\_AAT, C\_ACA, C\_ACC, C\_ACG, C\_ACT, C\_AGA, C\_AGC, C\_AGG, C\_AGT, C\_ATA, C\_ATC, C\_ATG, C\_ATT, C\_CAA, C\_CAC, C\_CAG, C\_CAT, C\_CCA, C\_CCC, C\_CCG, C\_CCT, C\_CGA, C\_CGC, C\_CGG, C\_CGT, C\_CTA, C\_CTC, C\_CTG, C\_CTT, C\_GAA, C\_GAC, C\_GAG, C\_GAT, C\_GCA, C\_GCC, C\_GCG, C\_GCT, C\_GGA, C\_GGC, C\_GGG, C\_GGT, C\_GTA, C\_GTC, C\_GTG, C\_GTT, C\_TAA, C\_TAC, C\_TAG, C\_TAT, C\_TCA, C\_TCC, C\_TCG, C\_TCT, C\_TGA, C\_TGC, C\_TGG, C\_TGT, C\_TTA, C\_TTC, C\_TTG, C\_TTT, G\_AAA, G\_AAC, G\_AAG, G\_AAT, G\_ACA, G\_ACC, G\_ACG, G\_ACT, G\_AGA, G\_AGC, G\_AGG, G\_AGT, G\_ATA, G\_ATC, G\_ATG, G\_ATT, G\_CAA, G\_CAC, G\_CAG, G\_CAT, G\_CCA, G\_CCC, G\_CCG, G\_CCT, G\_CGA, G\_CGC, G\_CGG, G\_CGT, G\_CTA, G\_CTC, G\_CTG, G\_CTT, G\_GAA, G\_GAC, G\_GAG, G\_GAT, G\_GCA, G\_GCC, G\_GCG, G\_GCT, G\_GGA, G\_GGC, G\_GGG, G\_GGT, G\_GTA, G\_GTC, G\_GTG, G\_GTT, G\_TAA, G\_TAC, G\_TAG, G\_TAT, G\_TCA, G\_TCC, G\_TCG, G\_TCT, G\_TGA, G\_TGC, G\_TGG, G\_TGT, G\_TTA, G\_TTC, G\_TTG, G\_TTT, T\_AAA, T\_AAC, T\_AAG, T\_AAT, T\_ACA, T\_ACC, T\_ACG, T\_ACT, T\_AGA, T\_AGC, T\_AGG, T\_AGT, T\_ATA, T\_ATC, T\_ATG, T\_ATT, T\_CAA, T\_CAC, T\_CAG, T\_CAT, T\_CCA, T\_CCC, T\_CCG, T\_CCT, T\_CGA, T\_CGC, T\_CGG, T\_CGT, T\_CTA, T\_CTC, T\_CTG, T\_CTT, T\_GAA, T\_GAC, T\_GAG, T\_GAT, T\_GCA, T\_GCC, T\_GCG, T\_GCT, T\_GGA, T\_GGC, T\_GGG, T\_GGT, T\_GTA, T\_GTC, T\_GTG, T\_GTT, T\_TAA, T\_TAC, T\_TAG, T\_TAT, T\_TCA, T\_TCC, T\_TCG, T\_TCT, T\_TGA, T\_TGC, T\_TGG, T\_TGT, T\_TTA, T\_TTC, T\_TTG, T\_TTT, A\_\_AAA, A\_\_AAC, A\_\_AAG, A\_\_AAT, A\_\_ACA, A\_\_ACC, A\_\_ACG, A\_\_ACT, A\_\_AGA, A\_\_AGC, A\_\_AGG,

A\_\_AGT, A\_\_ATA, A\_\_ATC, A\_\_ATG, A\_\_ATT, A\_\_CAA, A\_\_CAC, A\_\_CAG, A\_\_CAT, A\_\_CCA, A\_\_CCC, A\_\_CCG, A\_\_CCT, A\_\_CGA, A\_\_CGC, A\_\_CGG, A\_\_CGT, A\_\_CTA, A\_\_CTC, A\_\_CTG, A\_\_CTT, A\_\_GAA, A\_\_GAC, A\_\_GAG, A\_\_GAT, A\_\_GCA, A\_\_GCC, A\_\_GCG, A\_\_GCT, A\_\_GGA, A\_\_GGC, A\_\_GGG, A\_\_GGT, A\_\_GTA, A\_\_GTC, A\_\_GTG, A\_\_GTT, A\_\_TAA, A\_\_TAC, A\_\_TAG, A\_\_TAT, A\_\_TCA, A\_\_TCC, A\_\_TCG, A\_\_TCT, A\_\_TGA, A\_\_TGC, A\_\_TGG, A\_\_TGT, A\_\_TTA, A\_\_TTC, A\_\_TTG, A\_\_TTT, C\_\_AAA, C\_\_AAC, C\_\_AAG, C\_\_AAT, C\_\_ACA, C\_\_ACC, C\_\_ACG, C\_\_ACT, C\_\_AGA, C\_\_AGC, C\_\_AGG, C\_\_AGT, C\_\_ATA, C\_\_ATC, C\_\_ATG, C\_\_ATT, C\_\_CAA, C\_\_CAC, C\_\_CAG, C\_\_CAT, C\_\_CCA, C\_\_CCC, C\_\_CCG, C\_\_CCT, C\_\_CGA, C\_\_CGC, C\_\_CGG, C\_\_CGT, C\_\_CTA, C\_\_CTC, C\_\_CTG, C\_\_CTT, C\_\_GAA, C\_\_GAC, C\_\_GAG, C\_\_GAT, C\_\_GCA, C\_\_GCC, C\_\_GCG, C\_\_GCT, C\_\_GGA, C\_\_GGC, C\_\_GGG, C\_\_GGT, C\_\_GTA, C\_\_GTC, C\_\_GTG, C\_\_GTT, C\_\_TAA, C\_\_TAC, C\_\_TAG, C\_\_TAT, C\_\_TCA, C\_\_TCC, C\_\_TCG, C\_\_TCT, C\_\_TGA, C\_\_TGC, C\_\_TGG, C\_\_TGT, C\_\_TTA, C\_\_TTC, C\_\_TTG, C\_\_TTT, G\_\_AAA, G\_\_AAC, G\_\_AAG, G\_\_AAT, G\_\_ACA, G\_\_ACC, G\_\_ACG, G\_\_ACT, G\_\_AGA, G\_\_AGC, G\_\_AGG, G\_\_AGT, G\_\_ATA, G\_\_ATC, G\_\_ATG, G\_\_ATT, G\_\_CAA, G\_\_CAC, G\_\_CAG, G\_\_CAT, G\_\_CCA, G\_\_CCC, G\_\_CCG, G\_\_CCT, G\_\_CGA, G\_\_CGC, G\_\_CGG, G\_\_CGT, G\_\_CTA, G\_\_CTC, G\_\_CTG, G\_\_CTT, G\_\_GAA, G\_\_GAC, G\_\_GAG, G\_\_GAT, G\_\_GCA, G\_\_GCC, G\_\_GCG, G\_\_GCT, G\_\_GGA, G\_\_GGC, G\_\_GGG, G\_\_GGT, G\_\_GTA, G\_\_GTC, G\_\_GTG, G\_\_GTT, G\_\_TAA, G\_\_TAC, G\_\_TAG, G\_\_TAT, G\_\_TCA, G\_\_TCC, G\_\_TCG, G\_\_TCT, G\_\_TGA, G\_\_TGC, G\_\_TGG, G\_\_TGT, G\_\_TTA, G\_\_TTC, G\_\_TTG, G\_\_TTT, T\_\_AAA, T\_\_AAC, T\_\_AAG, T\_\_AAT, T\_\_ACA, T\_\_ACC, T\_\_ACG, T\_\_ACT, T\_\_AGA, T\_\_AGC, T\_\_AGG, T\_\_AGT, T\_\_ATA, T\_\_ATC, T\_\_ATG, T\_\_ATT, T\_\_CAA, T\_\_CAC, T\_\_CAG, T\_\_CAT, T\_\_CCA, T\_\_CCC, T\_\_CCG, T\_\_CCT, T\_\_CGA, T\_\_CGC, T\_\_CGG, T\_\_CGT, T\_\_CTA, T\_\_CTC, T\_\_CTG, T\_\_CTT, T\_\_GAA, T\_\_GAC, T\_\_GAG, T\_\_GAT, T\_\_GCA, T\_\_GCC, T\_\_GCG, T\_\_GCT, T\_\_GGA, T\_\_GGC, T\_\_GGG, T\_\_GGT, T\_\_GTA, T\_\_GTC, T\_\_GTG, T\_\_GTT, T\_\_TAA, T\_\_TAC, T\_\_TAG, T\_\_TAT, T\_\_TCA, T\_\_TCC, T\_\_TCG, T\_\_TCT, T\_\_TGA, T\_\_TGC, T\_\_TGG, T\_\_TGT, T\_\_TTA, T\_\_TTC, T\_\_TTG, and T\_\_TTT of the whole sequence of DNA respectively.

## 6.8.2 Command for generate dataset only monoTriKGap method

```
mrz@rafsanjani: ~/PyFeat/Codes
mrz@rafsanjani:~/PyFeat/Codes$ python main.py -fa=/home/mrz/PyFeat/Datasets/DNA/demoFASTAs.txt -la=/home/mrz/PyFeat/Datasets/DNA/demoLabels.txt -full=1 -optimum=1 -f13=1 -kgap=1

Datasets fetching done.
Features extraction begins. Be patient! The machine will take some time.
Features extraction ends.
[Total extracted feature: 256]

Converting (full) CSV is begin.
Converting (full) CSV is end.

Features selection begins. Be patient! The Machine will take some time.
Features selection ends.
[Total selected feature: 5]

Converting (optimum) CSV is begin.
Converting (optimum) CSV is end.
mrz@rafsanjani:~/PyFeat/Codes$ |
```

Figure 17: Extract features using monoTriKGap with -kgap=1

## 6.8.3 Generate dataset using monoTriKGap

For '>Positive Sequence':  $\sum A\_AAA=3, \sum A\_AAC=0, \sum A\_AAG=1, \sum A\_AAT=0$ , and so on; and '>Negative Sequence':  $\sum A\_AAA=2, \sum A\_AAC=2, \sum A\_AAG=0, \sum A\_AAT=0$ , and so on.

Box 9: Sample dataset using monoTriKGap (File name: fullDataset.csv)

|                                |
|--------------------------------|
| 3, 0, 1, 0, 0, 0, 0, 0, ..., 1 |
| 2, 2, 0, 0, 0, 0, 1, 0, ..., 0 |

## 6.9 diMonoKGap

### 6.9.1 diMonoKGap Theoretical Description

When -kgap=n then the  $(4 \times 4) \times (4) \times n$  features will exist for DNA and RNA but  $(20 \times 20) \times (20) \times n$  features will exist for protein.

When -kgap=1, feature structure will be **XX\_X**.

When -kgap=2, feature structure will be **XX\_X**, and **XX\_\_X**.

When -kgap=3, feature structure will be **XX\_X**, **XX\_\_X**, and **XX\_\_\_X**.

## 6.9.2 Command for generate dataset only diMonoKGap method

```
mrz@rafsanjani: ~/PyFeat/Codes
mrz@rafsanjani:~/PyFeat/Codes$ python main.py -fa=/home/mrz/PyFeat/Datasets/DNA/demoFASTAs.txt -la=/home/mrz/PyFeat/Datasets/DNA/demoLabels.txt -full=1 -optimum=1 -f2l=1 -kgap=1

Datasets fetching done.
Features extraction begins. Be patient! The machine will take some time.
Features extraction ends.
[Total extracted feature: 64]

Converting (full) CSV is begin.
Converting (full) CSV is end.

Features selection begins. Be patient! The Machine will take some time.
Features selection ends.
[Total selected feature: 39]

Converting (optimum) CSV is begin.
Converting (optimum) CSV is end.
mrz@rafsanjani:~/PyFeat/Codes$ |
```

Figure 18: Extract features using diMonoKGap with -kgap=1

## 6.9.3 Generate dataset using diMonoKGap

For '>Positive Sequence':  $\sum AA\_A=3, \sum AA\_C=1, \sum AA\_G=1, \sum AA\_T=0$ , and so on;  
and '>Negative Sequence':  $\sum AA\_A=3, \sum AA\_C=1, \sum AA\_G=1, \sum AA\_T=1$ , and so on.

Box 10: Sample dataset using diMonoKGap (File name: fullDataset.csv)

|                                |
|--------------------------------|
| 3, 1, 1, 0, 1, 0, 0, 0, ..., 1 |
| 3, 1, 1, 1, 2, 1, 0, 0, ..., 0 |

## 6.10 diDiKGap

### 6.10.1 diDiKGap Theoretical Description

When -kgap=n then the  $(4 \times 4) \times (4 \times 4) \times n$  features will exist for DNA and RNA but  $(20 \times 20) \times (20 \times 20) \times n$  features will exist for protein.

When -kgap=1, feature structure will be **XX\_XX**.

When -kgap=2, feature structure will be **XX\_XX**, and **XX\_\_XX**.

When -kgap=3, feature structure will be **XX\_XX**, **XX\_\_XX**, and, **XX\_\_\_XX**.

## 6.10.2 Command for generate dataset only diDiKGap method

```
mrz@rafsanjani: ~/PyFeat/Codes
mrz@rafsanjani:~/PyFeat/Codes$ python main.py -fa=/home/mrz/PyFeat/Datasets/DNA/demoFASTAs.txt -la=/home/mrz/PyFeat/Datasets/DNA/demoLabels.txt -full=1 -optimum=1 -f22=1 -kgap=1

Datasets fetching done.
Features extraction begins. Be patient! The machine will take some time.
Features extraction ends.
[Total extracted feature: 256]

Converting (full) CSV is begin.
Converting (full) CSV is end.

Features selection begins. Be patient! The Machine will take some time.
Features selection ends.
[Total selected feature: 27]

Converting (optimum) CSV is begin.
Converting (optimum) CSV is end.
mrz@rafsanjani:~/PyFeat/Codes$ |
```

Figure 19: Extract features using diDiKGap with -kgap=1

## 6.10.3 Generate dataset using diDiKGap

For '>Positive Sequence':  $\sum AA_{AA}=2, \sum AA_{AC}=0, \sum AA_{AG}=1, \sum AA_{AT}=0$ , and so on; and '>Negative Sequence':  $\sum AA_{AA}=2, \sum AA_{AC}=1, \sum AA_{AG}=0, \sum AA_{AT}=0$ , and so on.

Box 11: Sample dataset using diDiKGap (File name: fullDataset.csv)

|                                |
|--------------------------------|
| 2, 0, 1, 0, 0, 1, 0, 0, ..., 1 |
| 2, 1, 0, 0, 0, 0, 1, 0, ..., 0 |

## 6.11 diTriKGap

### 6.11.1 diTriKGap Theoretical Description

When -kgap= $n$  then the  $(4 \times 4) \times (4 \times 4 \times 4) \times n$  features will exist for DNA and RNA but  $(20 \times 20) \times (20 \times 20 \times 20) \times n$  features will exist for protein.

When -kgap=1, feature structure will be **XX\_XXX**.

When -kgap=2, feature structure will be **XX\_XXX**, and **XX\_\_XXX**.

When -kgap=3, feature structure will be **XX\_XXX**, **XX\_\_XXX**, and **XX\_\_\_XXX**.

### 6.11.2 Command for generate dataset only diTriKGap method

```
mrz@rafsanjani: ~/PyFeat/Codes
mrz@rafsanjani:~/PyFeat/Codes$ python main.py -fa=/home/mrz/PyFeat/Datasets/DNA/demoFASTAs.txt -la=/home/mrz/PyFeat/Datasets/DNA/demoLabels.txt -full=1 -optimum=1 -f23=1 -kgap=1

Datasets fetching done.
Features extraction begins. Be patient! The machine will take some time.
Features extraction ends.
[Total extracted feature: 1024]

Converting (full) CSV is begin.
Converting (full) CSV is end.

Features selection begins. Be patient! The Machine will take some time.
Features selection ends.
[Total selected feature: 12]

Converting (optimum) CSV is begin.
Converting (optimum) CSV is end.
mrz@rafsanjani:~/PyFeat/Codes$ |
```

Figure 20: Extract features using diTriKGap with -kgap=1

### 6.11.3 Generate dataset using diTriKGap

For '>Positive Sequence':  $\sum AA\_AAA=1, \sum AA\_AAC=0, \sum AA\_AAG=1, \sum AA\_AAT=0,$   
and so on; and '>Negative Sequence':  $\sum AA\_AAA=1, \sum AA\_AAC=1, \sum AA\_AAG=0,$   
 $\sum AA\_AAT=0,$  and so on.

Box 12: Sample dataset using diTriKGap (File name: fullDataset.csv)

|                                |
|--------------------------------|
| 1, 0, 1, 0, 0, 0, 0, 0, ..., 1 |
| 1, 1, 0, 0, 0, 0, 1, 0, ..., 0 |

## 6.12 triMonoKGap

### 6.12.1 triMonoKGap Theoretical Description

When -kgap= $n$  then the  $(4 \times 4 \times 4) \times 4 \times n$  features will exist for DNA and RNA but  $(20 \times 20 \times 20) \times 20 \times n$  features will exist for protein.

When -kgap=1, feature structure will be **XXX\_X**.

When -kgap=2, feature structure will be **XXX\_X**, and **XXX\_\_X**.

When -kgap=3, feature structure will be **XXX\_X**, **XXX\_\_X**, and **XXX\_\_\_X**.

## 6.12.2 Command for generate dataset only triMonoKGap method

```
mrz@rafsanjani: ~/PyFeat/Codes
mrz@rafsanjani:~/PyFeat/Codes$ python main.py -fa=/home/mrz/PyFeat/Datasets/DNA/demoFASTAs.txt -la=/home/mrz/PyFeat/Datasets/DNA/demoLabels.txt -full=1 -optimum=1 -f31=1 -kgap=1

Datasets fetching done.
Features extraction begins. Be patient! The machine will take some time.
Features extraction ends.
[Total extracted feature: 256]

Converting (full) CSV is begin.
Converting (full) CSV is end.

Features selection begins. Be patient! The Machine will take some time.
Features selection ends.
[Total selected feature: 2]

Converting (optimum) CSV is begin.
Converting (optimum) CSV is end.
mrz@rafsanjani:~/PyFeat/Codes$ |
```

Figure 21: Extract features using triMonoKGap with -kgap=1

## 6.12.3 Generate dataset using triMonoKGap

For '>Positive Sequence':  $\sum AAA\_A=2, \sum AAA\_C=1, \sum AAA\_G=1, \sum AAA\_T=0$ , and so on; and '>Negative Sequence':  $\sum AAA\_A=2, \sum AAA\_C=1, \sum AAA\_G=1, \sum AAA\_T=0$ , and so on.

Box 13: Sample dataset using triMonoKGap (File name: fullDataset.csv)

|                                |
|--------------------------------|
| 2, 1, 1, 0, 0, 0, 0, 0, ..., 1 |
| 2, 1, 1, 0, 1, 1, 0, 0, ..., 0 |

## 6.13 triDiKGap

### 6.13.1 triDiKGap Theoretical Description

When -kgap=n then the  $(4 \times 4 \times 4) \times (4 \times 4) \times n$  features will exist for DNA and RNA but  $(20 \times 20 \times 20) \times (20 \times 20) \times n$  features will exist for protein.

When -kgap=1, feature structure will be **XXX\_XX**.

When -kgap=2, feature structure will be **XXX\_XX**, and **XXX\_\_XX**.

When -kgap=3, feature structure will be **XXX\_XX**, **XXX\_\_XX**, and **XXX\_\_\_XX**.



### 6.13.2 Command for generate dataset only triDiKGap method

```
mrz@rafsanjani: ~/PyFeat/Codes
mrz@rafsanjani:~/PyFeat/Codes$ python main.py -fa=/home/mrz/PyFeat/Datasets/DNA/demoFASTAs.txt -la=/home/mrz/PyFeat/Datasets/DNA/demoLabels.txt -full=1 -optimum=1 -f32=1 -kgap=1

Datasets fetching done.
Features extraction begins. Be patient! The machine will take some time.
Features extraction ends.
[Total extracted feature: 1024]

Converting (full) CSV is begin.
Converting (full) CSV is end.

Features selection begins. Be patient! The Machine will take some time.
Features selection ends.
[Total selected feature: 16]

Converting (optimum) CSV is begin.
Converting (optimum) CSV is end.
mrz@rafsanjani:~/PyFeat/Codes$ |
```

Figure 22: Extract features using triDiKGap with -kgap=1

### 6.13.3 Generate dataset using triDiKGap

For '>Positive Sequence':  $\sum AAA\_AA=1, \sum AAA\_AC=0, \sum AAA\_AG=1, \sum AAA\_AT=0,$   
and so on; and '>Negative Sequence':  $\sum AAA\_AA=1, \sum AAA\_AC=1, \sum AAA\_AG=0,$   
 $\sum AAA\_AT=0,$  and so on.

Box 14: Sample dataset using triDiKGap (File name: fullDataset.csv)

|                                |
|--------------------------------|
| 1, 0, 1, 0, 0, 1, 0, 0, ..., 1 |
| 1, 1, 0, 0, 0, 0, 1, 0, ..., 0 |

## 7 Feature Calculation

The number of features generated by each of our feature extraction models are shown in Table 1. Here we have employed kGaps of varying degrees. We use values ranging from 1 to 5 in case of DNA and RNA sequences and 1 to 10 in case of protein sequences. By applying Adaboost to our extracted features we select 950 features having maximum importance score for DNA and RNA and 1625 features for protein sequences.

Table 1: Feature calculation for DNA, RNA, and protein sequences

| Feature Name   | Feature extraction for DNA/RNA | Feature extraction for protein |
|----------------|--------------------------------|--------------------------------|
| zCurve         | 3                              | .....                          |
| gcContent      | 1                              | .....                          |
| atgcRatio      | 1                              | .....                          |
| cumulativeSkew | 2                              | .....                          |
| pseudoKNC      | 84                             | 8,420                          |
| monoMonoKGap   | 160                            | 4,000                          |
| monoDiKGap     | 640                            | 80,000                         |
| monoTriKGap    | 2,560                          | .....                          |
| diMonoKGap     | 640                            | 80,000                         |
| diDiKGap       | 2,560                          | .....                          |
| diTriKGap      | 10,240                         | .....                          |
| triMonoKGap    | 2,560                          | .....                          |
| triDiKGap      | 10,240                         | .....                          |
| <b>Total</b>   | <b>29,691</b>                  | <b>172,420</b>                 |

Table 1 shows, the feature extracted from DNA, RNA, and protein. Total 29,691 feature extracted from both DNA and RNA; and 172,420 feature extracted from protein.

## 8 AdaBoost

For feature selection and to reduce the impact of the curse of dimensionality and at the same time maintain informative features (Keogh and Mueen, 2017), we have employed AdaBoost classification model to calculate the average impurity-curtailment achieved by splitting upon each of the features in all of the trees trained on different weight distributions of the instances.

Here we use AdaBoost classifier implemented in scikit package in python with its default learning rate of 1 and C4.5 as its base learner. C4.5 has been widely used as the base learner for this classifier which also demonstrated good performance in our study. We have tried a different number of base learners to build AdaBoost which among them, using 500 obtained the best results. Note that the RNA and protein datasets (used as case studies) include train and independent sets which enable us to assess the generality of our model and avoid any possible overfitting.

We then select  $n$  features with the maximum score for model training. It is to be noted that this selection mechanism is much more cost-effective compared to the wrapper-based methods since only one run of the AdaBoost model is sufficient for the selection process. Moreover, it is more effective compared to the other methods as different trees incorporate different instance weight distributions into the impurity measure which in turn adds diversity to the way features are selected for node splitting in different trees. Thus, making the selection process less likely to be adversely affected by the presence of multi-collinearity features (Wang, 2012).

## 9 Tool Comparison

In recent time, researchers have proposed many on-line and off-line tools. Most of the tools are well-established for generating features from for DNA, RNA, and protein sequences. In our tool (PyFeat), we have added some extra features and overcome the limitations of other tools. In table 2 we have tried to clarify the difference between other tool and PyFeat.

Table 2: Difference between other tool and PyFeat

| <b>Tool</b>          | <b>Applicable for</b>    | <b>Able to select features?</b> | <b>Online /Offline</b> | <b>Able to perform machine learning tasks?</b> | <b>Programming Language</b> |
|----------------------|--------------------------|---------------------------------|------------------------|------------------------------------------------|-----------------------------|
| repDNA [1]           | DNA                      | No                              | Offline                | No                                             | Python-2.7, Python-3.3      |
| repRNA [2]           | RNA                      | No                              | Online                 | No                                             | Unknown                     |
| Pse-in-One [3]       | DNA, RNA, Protein        | No                              | Online                 | No                                             | Python                      |
| Pse-Analysis [4]     | DNA, RNA, Protein        | No                              | Offline                | No                                             | Python                      |
| iFeatures [5]        | Protein                  | Yes                             | Offline                | No                                             | Python-3.0+                 |
| propy [6]            | Protein                  | No                              | Offline                | No                                             | Python-3.2                  |
| protr /pro-trWeb [7] | Protein                  | No                              | Offline and Online     | No                                             | R                           |
| <b>PyFeat</b>        | <b>DNA, RNA, Protein</b> | <b>Yes</b>                      | <b>Offline and CLI</b> | <b>Yes</b>                                     | <b>Python-3.6+</b>          |

Table 2 shows that the difference between other tool and PyFeat. Here, online and offline represents web tool and provides code respectively; CLI denotes **command line interface**.

## References

- [1] Bin Liu, Fule Liu, Longyun Fang, Xiaolong Wang, and Kuo-Chen Chou. repdna: a python package to generate various modes of feature vectors for dna sequences by incorporating user-defined physicochemical properties and sequence-order effects. *Bioinformatics*, 31(8):1307–1309, 2014.
- [2] Bin Liu, Fule Liu, Longyun Fang, Xiaolong Wang, and Kuo-Chen Chou. reprna: a web server for generating various feature vectors of rna sequences. *Molecular Genetics and Genomics*, 291(1):473–481, 2016.
- [3] Bin Liu, Fule Liu, Xiaolong Wang, Junjie Chen, Longyun Fang, and Kuo-Chen Chou. Pse-in-one: a web server for generating various modes of pseudo components of dna, rna, and protein sequences. *Nucleic acids research*, 43(W1):W65–W71, 2015.
- [4] Bin Liu, Hao Wu, Deyuan Zhang, Xiaolong Wang, and Kuo-Chen Chou. Pse-analysis: a python package for dna/rna and protein/peptide sequence analysis based on pseudo components and kernel methods. *Oncotarget*, 8(8):13338, 2017.
- [5] Zhen Chen, Pei Zhao, Fuyi Li, André Leier, Tatiana T Marquez-Lago, Yanan Wang, Geoffrey I Webb, A Ian Smith, Roger J Daly, Kuo-Chen Chou, et al. ifeature: a python package and web server for features extraction and selection from protein and peptide sequences. *Bioinformatics*, 1:4, 2018.
- [6] Dong-Sheng Cao, Qing-Song Xu, and Yi-Zeng Liang. propy: a tool to generate various modes of chous pseaac. *Bioinformatics*, 29(7):960–962, 2013.
- [7] Nan Xiao, Dong-Sheng Cao, Min-Feng Zhu, and Qing-Song Xu. protr/protrweb: R package and web server for generating various numerical representation schemes of protein sequences. *Bioinformatics*, 31(11):1857–1859, 2015.
- [8] Md Rafsan Jani, Md Toha Khan Mozlish, Sajid Ahmed, Dewan Md Farid, and Swakkhar Shatabda. irecspot-ef: Effective sequence based features for recombination hotspot prediction. *Computers in biology and medicine*, 2018.

- [9] Bin Liu. Bioseq-analysis: a platform for dna, rna and protein sequence analysis based on machine learning approaches. *Briefings in bioinformatics*, 2017.
- [10] Fabian Pedregosa, Gaël Varoquaux, Alexandre Gramfort, Vincent Michel, Bertrand Thirion, Olivier Grisel, Mathieu Blondel, Peter Prettenhofer, Ron Weiss, Vincent Dubourg, et al. Scikit-learn: Machine learning in python. *Journal of machine learning research*, 12(Oct):2825–2830, 2011.
- [11] Eamonn Keogh and Abdullah Mueen. Curse of dimensionality. In *Encyclopedia of Machine Learning and Data Mining*, pages 314–315. Springer, 2017.
- [12] Ruihu Wang. Adaboost for feature selection, classification and its relation with svm, a review. *Physics Procedia*, 25:800–807, 2012.
- [13] Hao Lin, En-Ze Deng, Hui Ding, Wei Chen, and Kuo-Chen Chou. ipro54-pseknc: a sequence-based predictor for identifying sigma-54 promoters in prokaryote with pseudo k-tuple nucleotide composition. *Nucleic acids research*, 42(21):12961–12972, 2014.
- [14] Wei Chen, Pengmian Feng, Hui Ding, and Hao Lin. Pai: Predicting adenosine to inosine editing sites by using pseudo nucleotide compositions. *Scientific reports*, 6:35123, 2016.
- [15] Hao Lin, Zhi-Yong Liang, Hua Tang, and Wei Chen. Identifying sigma70 promoters with novel pseudo nucleotide composition. *IEEE/ACM transactions on computational biology and bioinformatics*, 2017.
- [16] Mahmoud Ghandi, Dongwon Lee, Morteza Mohammad-Noori, and Michael A Beer. Enhanced regulatory sequence prediction using gapped k-mer features. *PLoS computational biology*, 10(7):e1003711, 2014.
- [17] Shahana Yasmin Chowdhury, Swakkhar Shatabda, and Abdollah Dehzangi. Idnaprot-es: Identification of dna-binding proteins using evolutionary and structural features. *Scientific Reports*, 7(1):14938, 2017.
